# Supplementary material
Source: PubMed Central journal article supplement (PMC9726888)
Supplement: sj-pdf-1-jhl-10.1177_08903344221134631.pdf [file sj-pdf-1-jhl-10.1177_08903344221134631.pdf]

# Eligibility Survey for Research Study: Analysis of SARS-CoV-2 antibodies in breastmilk from lactating mothers after vaccination

---

\* Required

Please click on the link below and read the entire consent form for this research project: (redacted for blind review)

1. Please confirm that you have read the consent form, have been provided a copy of the consent form, are 18 years of age or older, and wish to participate in the study by checking the boxes below. \*

*Check all that apply.*

I have read the above information about "Analysis of SARS-CoV-2 antibodies in breastmilk from lactating mothers after vaccination" and have been given an opportunity to ask questions and/or request a copy of this consent statement.

I have been provided with a copy of the consent form (downloadable as a pdf at the link above)

I affirm that I am 18 years of age or older.

I agree to participate in this project.

2. Your First Name: \*

---

3. Your Last Name: \*

---

4. Email address at which you can be contacted: \*

---

---

---

---

---

5. Date of Birth: \*

---

*Example: January 7, 2019*

6. Race: \*

*Check all that apply.*

- American Indian or Alaska Native
- Asian
- Black or African American
- Native Hawaiian or Other Pacific Islander
- White

7. Ethnicity:

*Mark only one oval.*

- Hispanic or Latino or Spanish Origin
- Not Hispanic or Latino or Spanish Origin

8. Are you currently pregnant? \*

*Mark only one oval.*

Yes

No

Not sure

9. Have you used antibiotics in the past 6 months? \*

*Mark only one oval.*

Yes

No

Not sure

10. Do you have any autoimmune conditions, disorders, or diseases? \*

*Mark only one oval.*

Yes

No

11. Do you have asthma? \*

*Mark only one oval.*

Yes

No

12. Your weight in pounds (lbs) \*

---

13. Your height in feet and inches (ex. 5' 6") \*

---

14. Which number pregnancy was your most recent pregnancy? \*

*Mark only one oval.*

1

2

3

4

5

6

7

8

9

10+

15. Date of delivery (childbirth) for most recent pregnancy: \*

---

*Example: January 7, 2019*

16. How many weeks and days pregnant were you when you delivered? Please format your answer as shown here in this example for 40 weeks 0 days: 40w0d \*

---

17. Did you have gestational diabetes in your most recent pregnancy? \*

*Mark only one oval.*

Yes

No

18. Did you have high blood pressure (hypertension) during your most recent pregnancy? \*

*Mark only one oval.*

Yes

No

19. Which vaccine did you receive? \*

*Mark only one oval.*

Pfizer/BioNTech (Comirnaty)

Moderna

Johnson & Johnson (Janssen)

Other: \_\_\_\_\_

20. When did you receive your first dose of the vaccine? \*

\_\_\_\_\_  
*Example: January 7, 2019*

21. When did you receive your second dose of the vaccine (if you previously received Pfizer/BioNtech or Moderna)?

\_\_\_\_\_  
*Example: January 7, 2019*

22. If you received the Pfizer/BioNTech vaccine, do you plan to receive the third dose (booster shot)?

*Mark only one oval.*

- Yes, I have already received the third dose.
- Yes, I plan to receive the third dose in the near future.
- No, I do not plan to receive the third dose.
- Other: \_\_\_\_\_

23. Please click the appropriate boxes below indicating which dose you received and at what time: \*

*Check all that apply.*

|             | before pregnancy         | first trimester          | second trimester         | third trimester          | postpartum               | have not yet received this dose | do not plan to receive this dose |
|-------------|--------------------------|--------------------------|--------------------------|--------------------------|--------------------------|---------------------------------|----------------------------------|
| first dose  | <input type="checkbox"/>        | <input type="checkbox"/>         |
| second dose | <input type="checkbox"/>        | <input type="checkbox"/>         |
| third dose  | <input type="checkbox"/>        | <input type="checkbox"/>         |

24. Have you had a known infection with SARS-CoV-2, the virus that causes COVID-19? Known infection means you tested positive for the virus by an antigen test, PCR-based test, or another approved at-home or clinical diagnostic test. \*

*Mark only one oval.*

- Yes
- No
- Other: \_\_\_\_\_

25. If you answered yes to the previous question, please record the date of the most recent occurrence for when you tested positive:

\_\_\_\_\_  
*Example: January 7, 2019*

26. Do you suspect you have had an infection with SARS-CoV-2 virus (but it was not formally diagnosed)?

*Mark only one oval.*

- Yes
- No
- Not sure
- Other: \_\_\_\_\_

27. If you answered yes to the previous question, approximately when did you suspect you had undiagnosed COVID-19? (MM/YYYY)

\_\_\_\_\_

**Thank you for completing the eligibility survey. The principal investigator will be in touch with you shortly if you qualify for the research study.**

# Final Survey (2 month time point) for Research Study: Analysis of SARS-CoV-2 antibodies in breastmilk from lactating mothers after vaccination

Please complete this survey 2 months (or later) after you have received your third (booster) shot with the Pfizer/BioNTech Comirnaty vaccine.

---

\* Required

1. Your First Name: \*

---

2. Your Last Name: \*

---

3. Have you stopped producing breastmilk since enrolling in this study? \*

*Mark only one oval.*

Yes

No

4. If you answered yes to the previous question, approximately when did you stop lactating?

---

*Example: January 7, 2019*



5. Have you become pregnant since enrolling in this research study? \*

*Mark only one oval.*

Yes

No

Not sure

6. If you answered yes to the previous question, when is your estimated due date?

---

*Example: January 7, 2019*

7. Have you used antibiotics of any form (oral, topical, etc.) since enrolling in this study? \*

*Mark only one oval.*

Yes

No

Not sure

8. Please record the exact date of your third (booster) shot of the Pfizer/BioNTech Comirnaty vaccine: \*

---

*Example: January 7, 2019*

9. Which of the following symptoms, if any, did you experience after receiving the third (booster) shot of the Pfizer vaccine? Please check all that apply. \*

*Check all that apply.*

- Injection site soreness (sore arm)
- Injection site rash (on the arm)
- Injection site swelling (on the arm)
- Injection site redness (on the arm)
- Other injection site reaction (on the arm)
- Headache
- Muscle or body aches
- Joint pain
- Fatigue or tiredness
- Fever
- Chills
- Allergic reaction
- Itching
- Nausea
- Vomiting
- Diarrhea
- Abdominal pain
- Rash not on the injection site
- No symptoms

Other:  \_\_\_\_\_

10. Have you had a known infection with SARS-CoV-2, the virus that causes COVID-19, since enrolling in this study? Known infection means you tested positive for the virus by an antigen test (i.e. Binax-now), PCR-based test, or another approved at-home or clinical diagnostic test. \*

*Mark only one oval.*

- Yes
- No
- Other: \_\_\_\_\_

11. If you answered yes to the previous question, please record the date when you tested positive:

---

*Example: January 7, 2019*

12. Do you suspect you have had a symptomatic infection with SARS-CoV-2 virus since enrolling in this study (but it was not formally diagnosed by an at-home or clinical test)? \*

*Mark only one oval.*

- Yes
- No
- Not sure
- Other: \_\_\_\_\_

13. If you answered yes to the previous question, approximately when do you suspect you had undiagnosed, symptomatic COVID-19? (MM/YYYY)

---

*Example: January 7, 2019*

14. Do you suspect you had an asymptomatic COVID-19 infection since enrolling in this study? (For example, perhaps you a member of your household was diagnosed with COVID-19 but you did not test yourself for the disease at that time, or you did not test positive if you did undergo testing.) \*

*Mark only one oval.*

- Yes
- No
- Not sure
- Other: \_\_\_\_\_

15. If you answered yes to the previous question, approximately when did this occur?  
(MM/YYYY)

---

16. Feel free to use this space to write any additional clarifying comments, information about your samples, COVID-19 exposure or symptoms, or other feedback for the investigator of this study.

---

---

---

---

---

**Thank you for completing the research study. The principal investigator should have sent you instructions for returning your breastmilk samples, blood sample, and a signed copy of your consent form. Please read those instructions carefully and return the samples no later than January 18th, 2022.**

---
